# Supplementary material
Source: PubMed Central journal article supplement (PMC3328629)
Supplement: NIHMS365194-supplement-1_si_001.pdf [file NIHMS365194-supplement-1_si_001.pdf]

## **Luciferase-based assay for adenosine: Application to S-adenosyl-L-homocysteine hydrolase.**

Emmanuel S. Burgos,<sup>1</sup> Shivali A. Gulab,<sup>1,2</sup> María B. Cassera<sup>3</sup> and Vern L. Schramm<sup>1</sup>

<sup>1</sup>Department of Biochemistry, Albert Einstein College of Medicine of Yeshiva University, 1300 Morris Park Avenue, Bronx, New York 10461, United States, <sup>2</sup>Carbohydrate Chemistry Team, Industrial Research Limited, PO Box 31-310, Lower Hutt, New Zealand, <sup>3</sup>Department of Biochemistry, Virginia Tech, Blacksburg, VA 24061, United States

### **Supporting Information**

|                                          |       |
|------------------------------------------|-------|
| 1. Supplementary Methods                 | S2    |
| 2. Supplementary Figures (Figures S1-S3) | S3-S5 |
| 3. Supplementary References              | S6    |

## 1. Supplementary Methods

**Phosphorylation of neplanocin A by AgAK.** Analyses were performed by HPLC on a reverse phase C<sub>18</sub> column (Luna<sup>2</sup>, 150×4.6 mm, 5 µm, 100 Å; phenomenex) using a protocol previously described;<sup>1</sup> ADO, AMP, GDP, GTP, SAH, INH and INH-P could be easily separated and our analyses demonstrate that INH is a substrate of AgAK according to the formation of GDP.

**SAHH inhibition by neplanocin A (INH).** In absence of AgAK, two experiments were performed in parallel. The SAHH enzyme mixture (100 mM TRIS-acetate pH 7.7, 0.5 mM PEP, 0.5 mM PPi, 2 mM ammonium chloride, 10 mM MgCl<sub>2</sub>, 0.5 mM GTP, 1 mM THP and 250 mU L<sup>-1</sup> of SAHH) was rapidly added to an equal volume of SAH (40 µM; with or without 12 µM INH). Samples were taken every ten minutes, quenched by ultrafiltration (Biomax UltraFree 0.5 mL centrifugal filter, 10 KD NMWL; Millipore) and analyzed by HPLC to follow ADO production. In presence of the same kinase, two similar experiments were carried; the SAHH mixture (see above; supplied with 60 U L<sup>-1</sup> of AgAK) was added to an equal volume of SAH (40 µM; with or without 12 µM INH). Every ten minutes, samples were processed as described above to quantify the formation of AMP.

## 2. Supplementary Figures

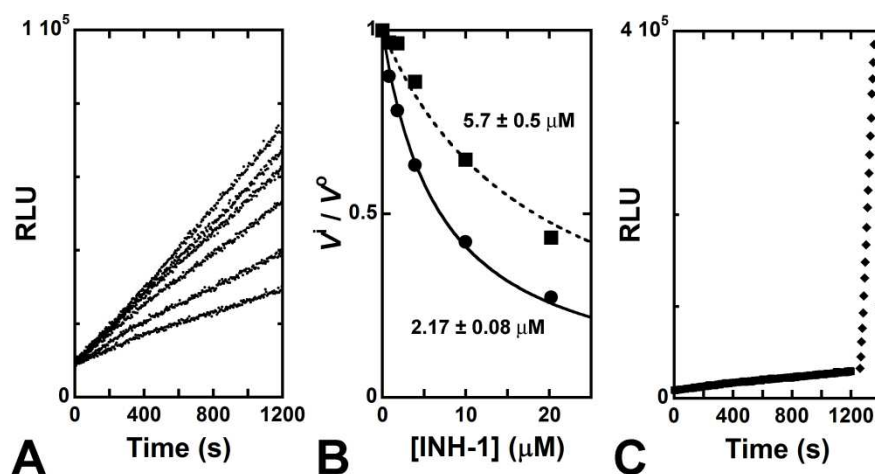

**Figure S1.**  $K_i$  evaluation for 5'-deoxy-5'-amino- $\beta$ -D-adenosine (INH-1). **A)** Light output profile monitored for 20 minutes at 20, 10, 4, 2 and 0.8  $\mu$ M of INH-1 (*cf.* Experimental Section). **B)** INH-1 displays a slight slow-onset inhibition (dashed trace) with a  $K_i^*$  of  $2.17 \pm 0.08 \mu$ M. **C)** Assay control for molecules displaying micromolar  $K_i$ s. At the end of the inhibition experiment with INH-1 (20  $\mu$ M), ADO was added to a 50  $\mu$ M final concentration and luminescence was monitored; the coupling enzymes AK/PPDK/FLUC are not inhibited by high concentrations of INH-1 (diamonds signs).

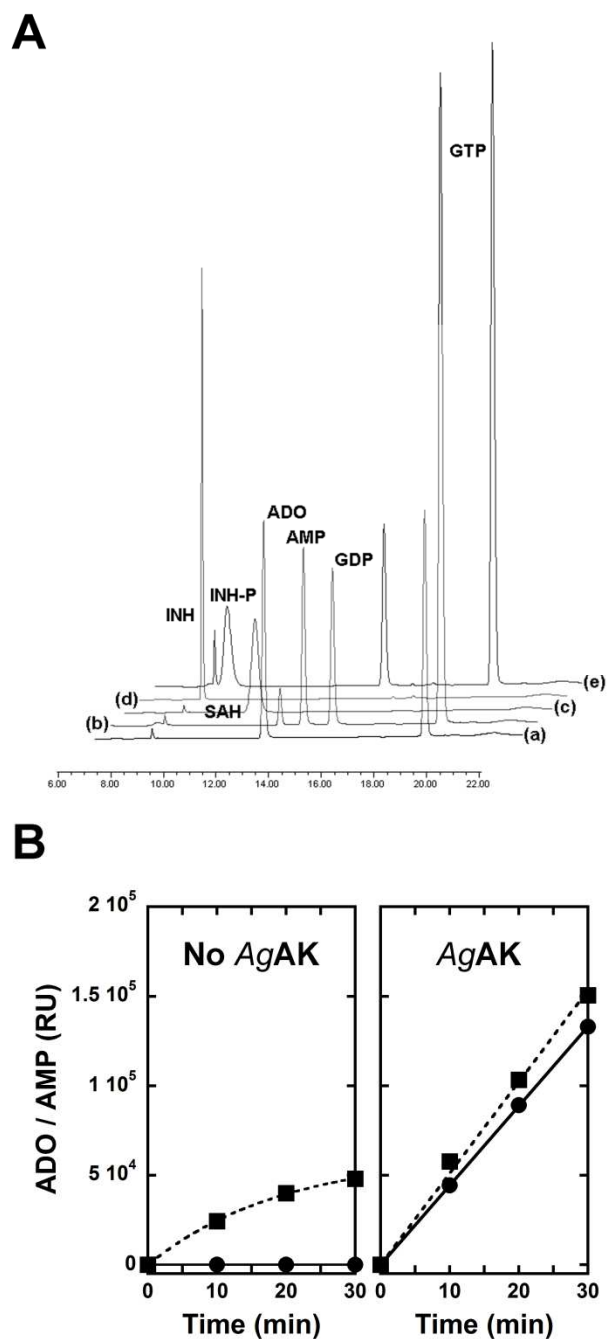

**Figure S2.** The phosphorylation of neplanocin A by AgAK and its implications for future screenings with our luciferase-based assay. **A)** HPLC analysis of species encountered during the assay. ADO and GTP (Trace a) are converted to AMP and GDP (Trace b) upon addition of AgAK; starting material SAH, substrate of SAHH (Trace c) and neplanocin A (Trace d); according to the production of GDP, neplanocin A (INH) is a substrate of AgAK and get phosphorylated into INH-P (Trace e). **B)** Under conditions where AgAK is omitted (left panel), INH (6  $\mu$ M) fully inhibits the production of ADO by SAHH (100 nM; solid trace, round signs) in presence of SAH (20  $\mu$ M). However, INH gets fully phosphorylated when the kinase is added to the enzyme mixture (30 mU mL<sup>-1</sup> final concentration) and there was no inhibition observed (right panel). The AMP production for the control (no inhibitor; dashed line, square signs) and the measure experiments (with inhibitor; solid line, round signs) are nearly identical.

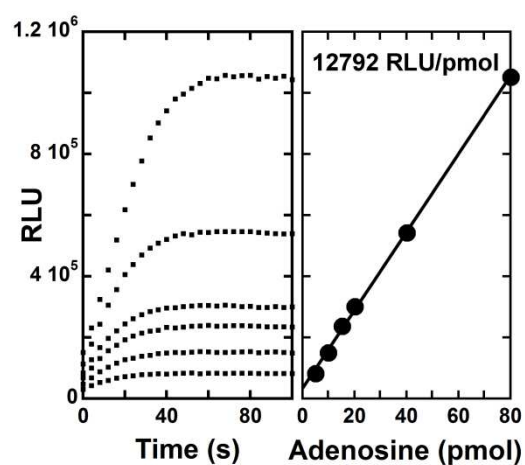

**Figure S3.** Effect of DMSO on the chemiluminescence output. A new ADO calibration was established in presence of DMSO (1.75%, v/v) using the typical experimental conditions; the linear response display the same sensitivity as our previous calibration experiment where DMSO was omitted ( $12792 \text{ RLU pmol}^{-1}$  vs.  $12570 \text{ RLU pmol}^{-1}$ ). Thus, the coupling enzymes AK/PPDK/FLUC are not affected by this organic solvent.

### **3. Supplementary References**

- (1) Burgos, E. S.; Schramm, V. L. *Biochemistry* **2008**, *47*, 11086-11096.
